# Supplementary material for: Catalyst-free thiazolidine formation chemistry enables the facile construction of peptide/protein–cell conjugates (PCCs) at physiological pH
Source: Royal Society of Chemistry journal article supplement (doi:10.1039/d3sc01382k), 2023-01-01
Supplement: d3sc01382k1.pdf [file d3sc01382k1.pdf]

## Supplementary Information

### **Catalyst-free thiazolidine formation chemistry enables the facile construction of peptide/protein-cell conjugates (PCCs) at physiological pH**

Xiangquan Liu,<sup>a</sup> Youyu Wang,<sup>a</sup> Bangce Ye <sup>\*a,b</sup> and Xiaobao Bi <sup>\*a</sup>

a. Collaborative Innovation Center of Yangtze River Delta Region Green Pharmaceuticals, College of Pharmaceutical Sciences, Zhejiang University of Technology, Hangzhou 310014, Zhejiang, China. E-mail: xbbi@zjut.edu.cn; yebangce@zjut.edu.cn

b. Lab of Biosystem and Microanalysis, State Key Laboratory of Bioreactor Engineering, East China University of Science & Technology, Shanghai, 200237, China. E-mail: bcyecust.edu.cn

## Table of Contents

|                                                                                                                              |    |
|------------------------------------------------------------------------------------------------------------------------------|----|
| Figure S1. Mass analysis of probe 1 and 2. ....                                                                              | 3  |
| Figure S2. Mass analysis of peptide 3.....                                                                                   | 4  |
| Figure S3. Fluorescent microscopy images of fluorescently labeled HeLa and MCF-7 cells using SpyCASE. ....                   | 5  |
| Figure S4. Time-course study of the effects of Pd on cell viability. ....                                                    | 6  |
| Figure S5. Time-course study of the fluorescence intensity of fluorescently labeled NK-92MI analyzed by flow cytometry. .... | 7  |
| Figure S6. The effects of periodate oxidation on NK-92MI cell viability. ....                                                | 8  |
| Figure S7. Western blot analysis of EGFR expression level in different cancer cells. ....                                    | 9  |
| Figure S8. Relative ratios of the number of adherent THP-1 cells before and after Pd treatment .....                         | 10 |
| Table S1. Primers used for this study.....                                                                                   | 11 |
| Sequence of SpyCatcher003-sfGFP fusion protein.....                                                                          | 12 |
| Sequence of SpyCatcher003-mCherry fusion protein.....                                                                        | 13 |

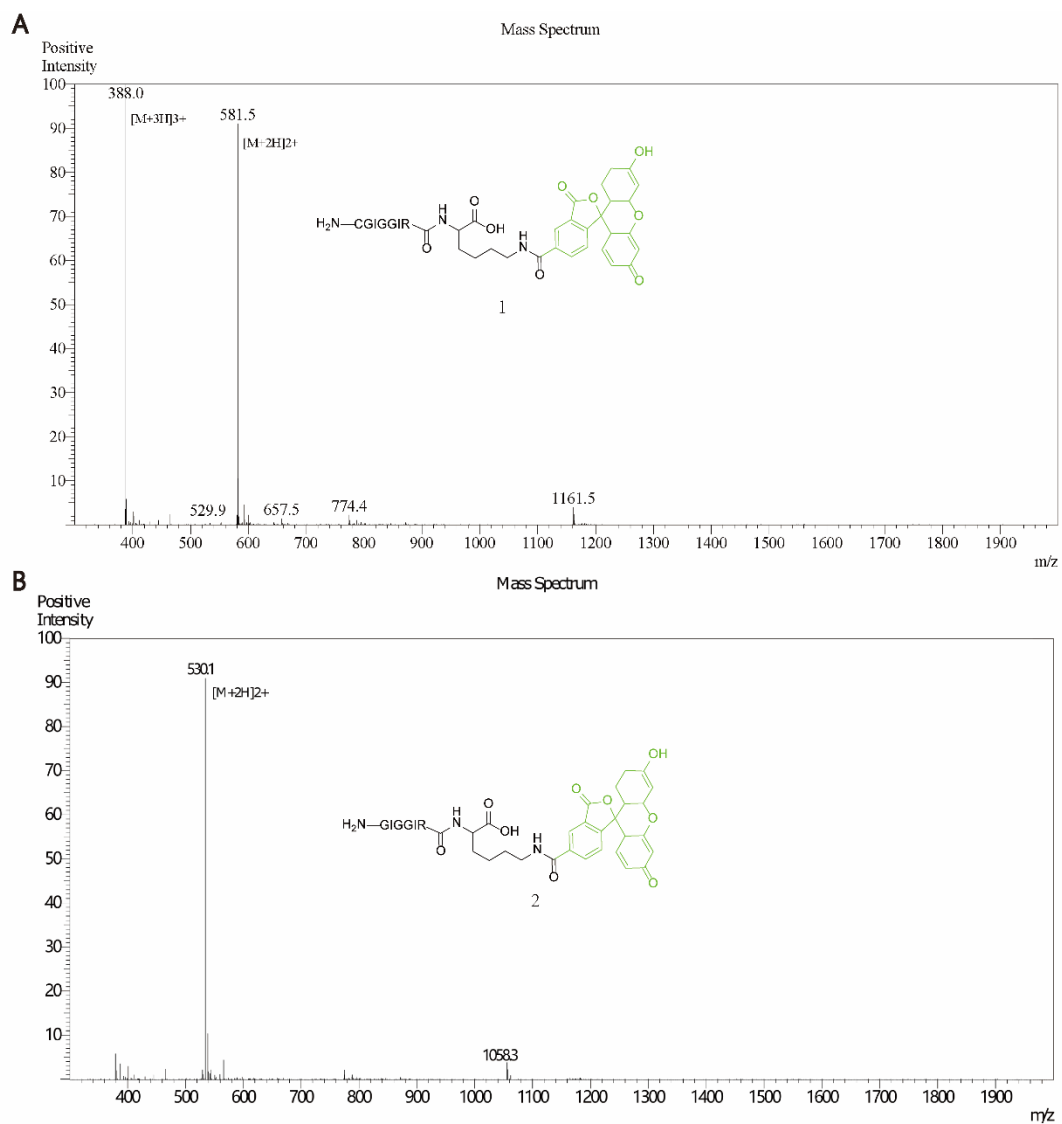

**Figure S1. Mass analysis of probe 1 and 2.** (A) Mass analysis of **1** with expected MW: 1161.28 Da, observed MW: 1161.0 Da. (B) Mass analysis of **2** with expected MW: 1058.27 Da, observed MW: 1058.2 Da.

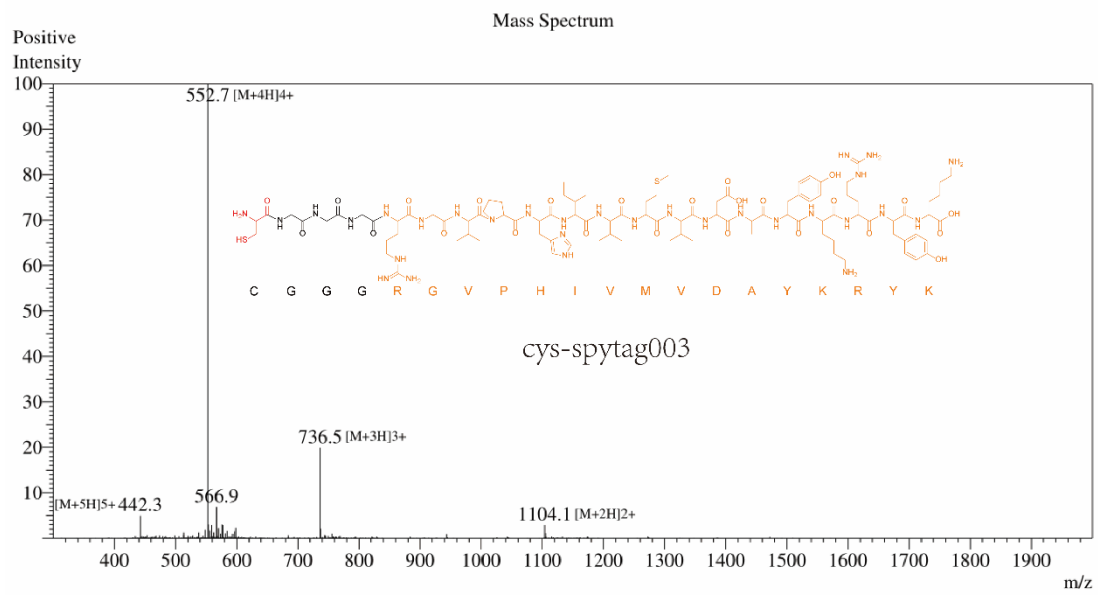

**Figure S2. Mass analysis of peptide 3.** Mass analysis of peptide **3** with expected MW: 2206.60 Da, observed MW: 2206.8 Da.

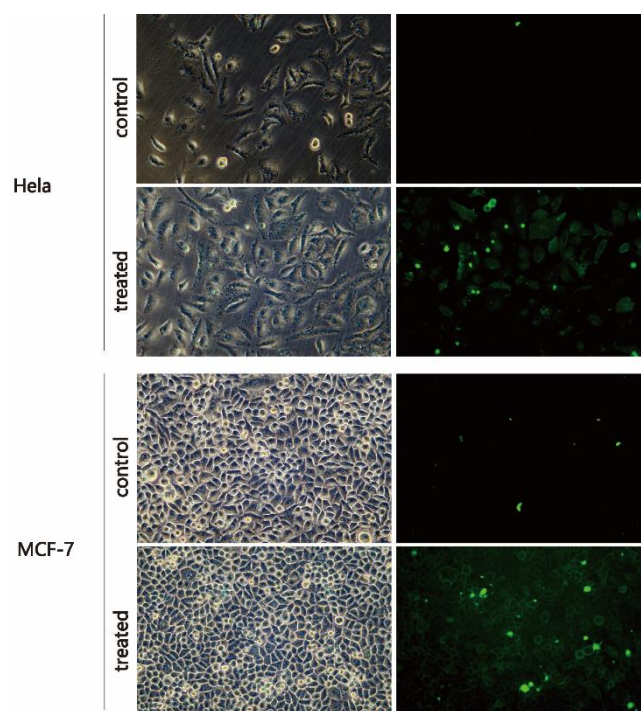

**Figure S3. Fluorescent microscopy images of fluorescently labeled HeLa and MCF-7 cells using SpyCASE.**

Cells (HeLa, MCF-7) were first treated with 1 mM sodium periodate for 5 mins at RT and then co-incubated with 20  $\mu\text{M}$  **3** in PBS (pH 7.4) for 1 h to immobilize SpyTag003 into the cell surface. Meanwhile, cells without periodate treatment were also incubated with **3** at the same conditions, serving as counterpart controls. After SpyTag003 conjugation and washing, the cells were re-grown in normal DMEM supplemented with 10  $\mu\text{M}$  **4** for sfGFP labeling via SpyCatcher-SpyTag chemistry. Results clearly showed that only oxidized cells could be successfully labeled, suggesting that **3** cannot be attached if there are no aldehyde groups at the cell surfaces.

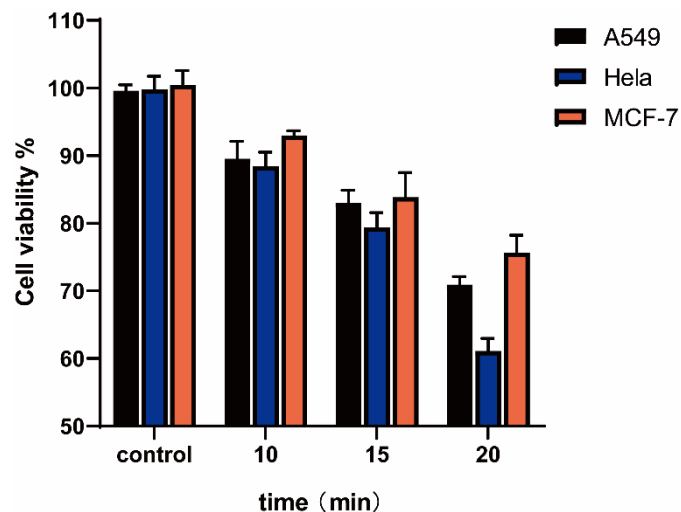

**Figure S4. Time-course study of the effects of Pd on cell viability.** Cells (A549, HeLa, MCF-7,  $1 \times 10^5$  cells) were treated with  $5 \mu\text{M}$   $[\text{PdCl}(\text{allyl})]_2$  in PBS (pH 7.4) supplemented with  $5 \mu\text{M}$  GSH at  $4^\circ\text{C}$  for 10, 15, 20 min, respectively. Treated cells were washed 3 times using PBS buffer, then resuspended in phenol-red-free MEM- $\alpha$  supplemented with both 10% FBS and 10% CCK-8 and incubated for 1 h at  $37^\circ\text{C}$ . The optical density at 450 nm wavelength was then detected using a microplate reader (BioTek Instrument, Winooski, VT, USA).

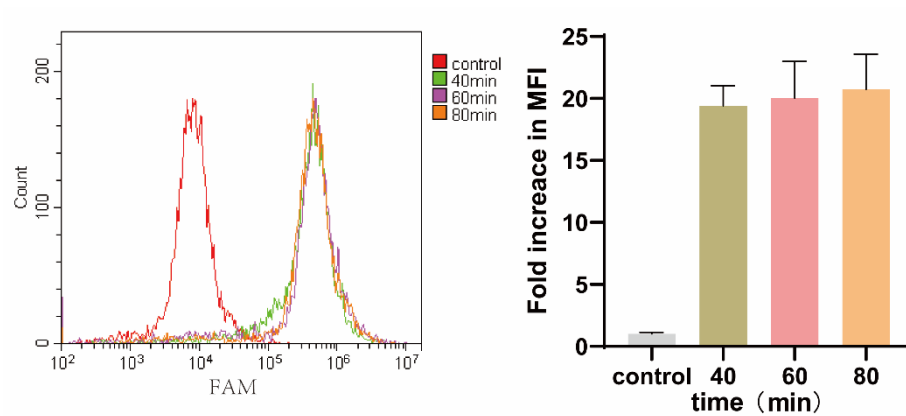

**Figure S5. Time-course study of the fluorescence intensity of fluorescently labeled NK-92MI analyzed by flow cytometry.** Periodate-treated NK-92MI cells were labeled with 15  $\mu$ M **1** at RT for 40, 60, 80 min, respectively. Non-treated cells were used as the control.

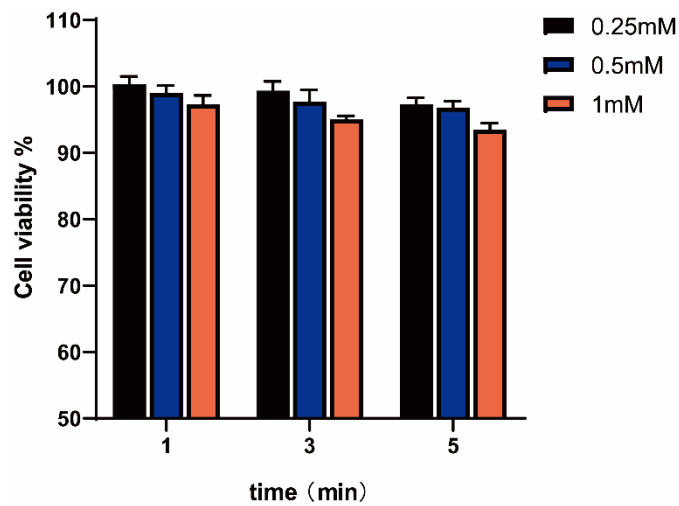

**Figure S6. The effects of periodate oxidation on NK-92MI cell viability.** NK-92MI cells ( $1 \times 10^5$  cells) were treated with different concentrations of periodate (0, 0.25, 0.5, 1 mM) for different time (1, 3, 5 min). Treated NK-92MI cells were washed 3 times using PBS buffer, then resuspended in phenol-red-free MEM- $\alpha$  supplemented with both 10% FBS and 10% CCK-8 and incubated for 1 h at 37 °C. The optical density at 450 nm wavelength was then detected using a microplate reader (BioTek Instrument, Winooski, VT, USA).



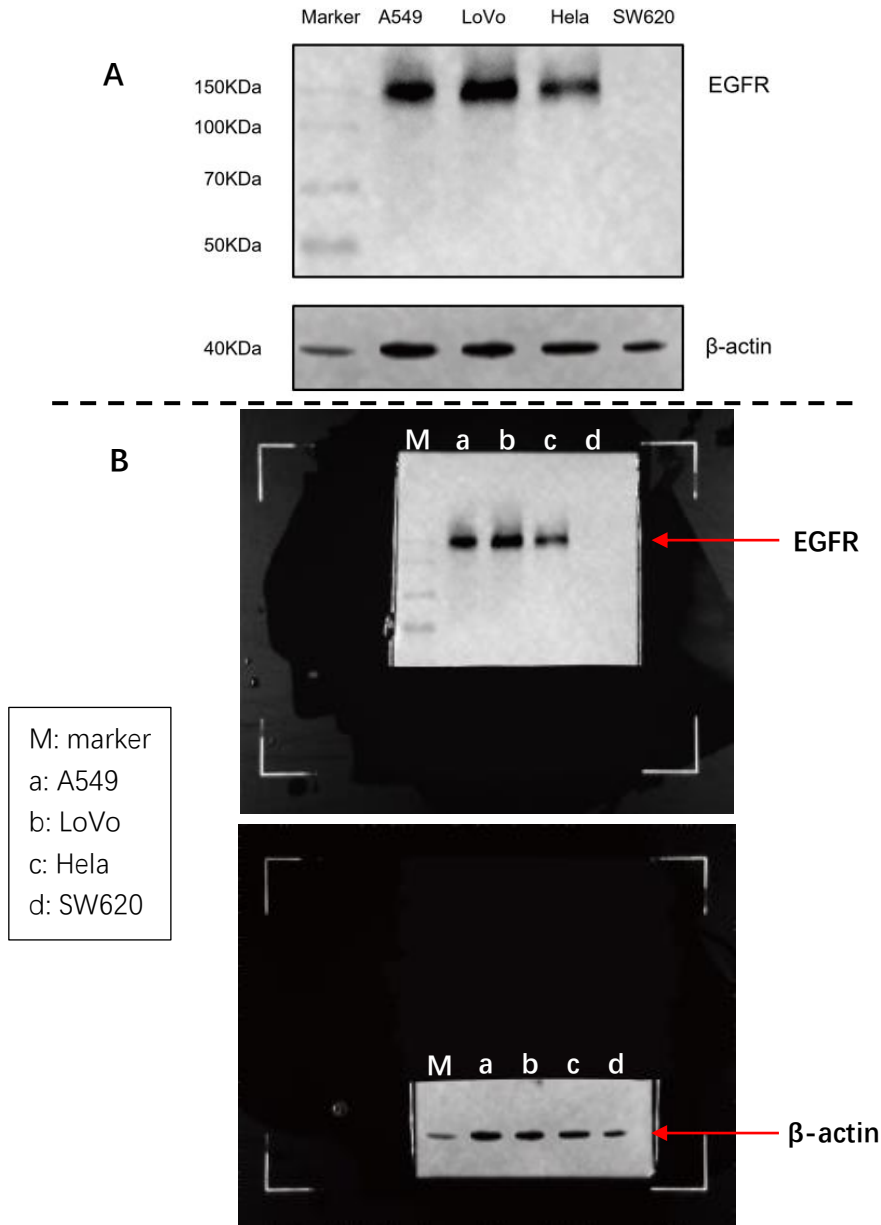

**Figure S7. Western blot analysis of EGFR expression level in different cancer cells.** (A) The processed image. (B) Raw data. Cancer cells collected in 1.5 mL tube were lysed in boiling water bath for 15 min after being suspended in an SDS-PAGE loading buffer. After BCA assay, samples were carried out for SDS-PAGE gel separation and then transferred to PVDF membrane. Since  $\beta$ -actin was used as the internal standard for quantification in this assay, PVDF membrane was cut into two pieces and needed to be incubated separately with the two different antibodies. The PVDF membrane after blocking by 5% skimmed milk was exposed into anti-EGFR antibody (1:1000) or  $\beta$ -actin antibody (1:1000) at 4 °C overnight for detection of EGFR and  $\beta$ -actin, respectively. Then HRP-conjugated goat anti-rabbit IgG (1:1000) antibodies was added for incubation at rt. for 1 h. After washing three times with TBST, the Chemical Scope series (Clinx Science Instruments Co., Ltd, China) was used to capture the membrane which was treated with an ECL kit. In panel a, the image was cropped from the original scan of blots and labeled with MW makers to localize the band corresponding to the detected EGFR and  $\beta$ -actin. The expected of molecular weight of EGFR is 170 KDa and that of  $\beta$ -actin is 41 KDa. In panel b, the unprocessed scans of original blots were also provided for the illustration of results.

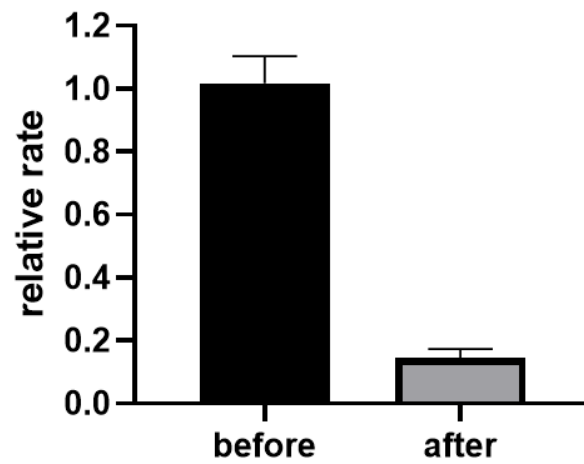

**Figure S8. Relative ratios of the number of adherent THP-1 cells before and after Pd treatment.** The number of cells before and after Pd cleavage was calculated using the "Image J" software. The data showed, after Pd treatment, that about 85% of the attached cells were separated from the interacting A549 cells.

**Table S1. Primers used for this study.**

| Primer   | Sequence (5'-3')                                     |
|----------|------------------------------------------------------|
| SC3-G F1 | AACTTTAAGAAGGAGATATACCATGGATGTCGTACTACCATCACCATCACC  |
| SC3-G R1 | TTTCATGCTGCTACCACTGGATCCGCTACCACTGGATCCAGTATGAGC     |
| SC3-G F2 | CAGTGGTAGCGGATCCAGTGGTAGCAGCATGAAAAAGTTAGCAAAGGTGAAG |
| SC3-G R2 | GCATTATGCGGCCGCAAGCTTTTACACGTGATTGCTGCCTTTATACAGTT   |
| SC3-M F1 | AACTTTAAGAAGGAGATATACCATGGATGTCGTACTACCATCACCATCACC  |
| SC3-M R1 | CTTGCTCACGCTGCTACCACTGGATCCGCTACCACTGGATCCAGTATGAGC  |
| SC3-M F2 | CAGTGGTAGCGGATCCAGTGGTAGCAGCGTGAGCAAGGGCGAGGACGAC    |
| SC3-M R2 | GCATTATGCGGCCGCAAGCTTTTACTTGTACAGCTCGTCCATGCCGC      |

Gene sequence of SpyCatcher003-sfGFP fusion protein (SpyCatcher003 highlighted with yellow; sfGFP highlighted with green):

ATGTCGTA  
CTACTACCA  
TCACCATCA  
CCATCACGA  
TTACGACAT  
CCCAACGAC  
CGAAAAA  
CCTGTATTT  
CAGGGCGCC  
ATGGTAACC  
ACCTTATCA  
GGTTTATCA  
GGTGAGCA  
AAGGTCCG  
GTGATATGA  
CAACTGAAG  
AAGATAGTG  
CTACCCAT  
ATTAATTCT  
CAAAACG  
TGATGAGG  
ACGGCCGT  
GAGTTAGCT  
GGTGCAACT  
ATGGAGTT  
GCGTGATT  
CATCTGGT  
AAAATATT  
AGTACATGG  
ATTTTCAG  
ATGGACAT  
GTGAAGG  
ATTTCTACC  
TGTATCC  
AGGAAAAT  
ATACATTT  
GTTCGAA  
ACCGCAG  
CACCAGAC  
CGGTTAT  
GAGGTA  
GCAACTCC  
AATTGAAT  
TTACAGTT  
AATGAGG  
ACGGTCAG  
GTTACTGT  
AGATGGT  
GAGCAACT  
GAAGGTG  
ACGCTCAT  
ACTGGAT  
CCAGTGG  
TAGCAGG  
ATCCAGT  
GGTAGC  
AGCATG  
AAAAAG  
TTAGCAA  
AGGTGA  
AGAACT  
GTTTACC  
GGCGTT  
GTGCCG  
ATTCT  
GGTGGA  
ACTGGAT  
GGTGAAT  
GGCCATA  
AATTTAG  
CGTTCGT  
GGCGAAG  
GC  
GAAGGT  
GATGCG  
ACCAAC  
GGTAACT  
GACCCT  
GAAATTT  
ATTTGC  
ACCACCG  
GTAA  
ACTGCC  
GTTCCG  
TGGGCC  
GACCCT  
GGTACC  
CCTGAC  
CTATGG  
CGTTCAG  
TGCT  
TTAGCC  
GCTATC  
CGGATC  
ATATGA  
AACGCC  
ATGATTT  
CTTTAA  
AAGCG  
CGATGCC  
G  
GAAGG  
CTATGT  
GCAGGA  
ACGTACC  
ATTAGCT  
TCAAAG  
ATGATG  
GCACCT  
ATAAA  
AC  
CCGTGC  
GGAAG  
TTAAAT  
TTGAAG  
GCGATA  
CCCTGG  
TGAACC  
GCATTG  
AACTGA  
AAA  
GGTATT  
GATTTT  
AAAGA  
AGATGG  
CAACAT  
TCTGGG  
TCATAA  
ACTGGA  
ATATA  
ATTTCT  
AACAGC  
CATAAT  
GTGTAT  
ATTACC  
GCCGAT  
AAACAG  
AAAAAT  
GGCATC  
AAAGCG  
A  
ACTTTA  
AAATCC  
GTCACA  
ACGTGG  
AAGATG  
GGTAGC  
GTGCAG  
CTGGCG  
GATCATT  
AT  
CAGCAG  
AATACC  
CCGATT  
GGTGAT  
GGCCGG  
TGCTGCT  
GCCGGA  
TAATCAT  
TATCT  
GAGCACC  
CAGAGC  
GTTCTG  
AGCAA  
AGATCC  
GAATGA  
AAAAAC  
CGTGAT  
CATATG  
GGTG  
CTGCTG  
GAATTT  
GTTACC  
GCCGCG  
GGCATT  
ACCCAC  
GGTATG  
GATGAA  
CTGTATA  
A

AGGCAGCAATCACGTG

**Amino acid sequence of SpyCatcher003-sfGFP:**

MSYYHHHHHDYDIPTTENLYFQGAMVTTLSGLSGEQGPSGDMTTEEDSATHIKFSKRDEDGRELAGATMELRDSS  
GKTISTWISDGHVKDFLYPGKYTFVETAAPDGYEVATPIEFTVNEDGQVTVDGEATEGDAHTGSSGSGSSGSSMKKV  
SKGEELFTGVVPIVELDGDVNGHKFSVRGEGEGDATNGKLT LKFICTTGKLPVPWPTLVTTLTYGVCFSRYPDHMKR  
HDFFKSAMPEGYVQERTISFKDDGTYKTRAEVKFEGDTLVNRIELKGIDFKEDGNILGHKLEYNFNSHNVIYITADKQKN  
GIKANFKIRHNVEDGSQLADHYQQNTPIGDGPVLLPDNHYLSTQSVLSKDPNEKRDHMVLLFEVTAAGITHGMDE  
LYKGSNHV\*

**Gene sequence of SpyCatcher003-mCherry fusion protein (SpyCatcher003 marked with yellow;  
mCherry highlighted with red):**

ATGTCGTA CTACCATCACCATCACCATCAGATTACGACATCCCAACGACCGAAAA  
CCTGTATTTTCAGGGCGCCATGGTAACCACCTTATCAGGTTTATCAGGTGAGCAAG  
GTCCGTCCGGTGATATGACAACTGAAGAAGATAGTGCTACCCATATTAAATTCTCA  
AAACGTGATGAGGACGGCCGTGAGTTAGCTGGTGCAACTATGGAGTTGCGTGATT  
CATCTGGTAAA ACTATTAGTACATGGATTT CAGATGGACATGTGAAGGATTTCTACC  
TGTATCCAGGAAAATATACATTTGTCGAAACCGCAGCACCAGACGGTTATGAGGTA  
GCAACTCCAATTGAATTTACAGTTAATGAGGACGGTCAGGTTACTGTAGATGGTGA  
AGCAACTGAAGGTGACGCTCATACTGGATCCAGTGGTAGC GGATCCAGTGGTAGC  
AGCGTGAGCAAGGGCGAGGACGACAACATGGCCATCATCAAGGAGTTCATGCGCT  
TCAAGGTGCACATGGAGGGCTCCGTGAACGGCCACGAGTTCGAGATCGAGGGCG  
AGGGCGAGGGCCGCCCTACGAGGGCACCCAGACCGCCAAGCTGAAGGTGACCA  
AGGGCGGCCCCCTGCCCTTCGCTGGGACATCCTGTCCCCTCAGTTCATGTACGGC  
TCCAAGGCCTACGTGAAGCACCCCGCCGACATCCCCGACTACTTGAAGCTGTCCTT  
CCCCGAGGGCTTCAAGTGGGAGCGCGTGATGAACTTCGAGGACGGCGGCGTGGT  
GACCGTGACCCAGGACTCCTCCCTGCAGGACGGCGAGTTCATCTACAAGGTGAAG

CTGCGCGGCACCAACTTCCCCTCCGACGGCCCCGTAATGCAGAAGAAGACCATGG  
GCTGGGAGGCCTCCTCCGAGCGGATGTACCCCGAGGACGGCGCCCTGAAGGGCG  
AGATCAAGCAGAGGCTGAAGCTGAAGGACGGCGGCCACTACGACGCCGAGGTCA  
AGACCACCTACAAGGCCAAGAAGCCCGTGCAGCTGCCCGGCGCCTACAACGTCAA  
CATCAAGCTGGACATCACCTCCCACAACGAGGACTACACCATCGTGGAACAGTAC  
GAGCGCGCCGAGGGCCGCACTCCACCGGCGGCATGGACGAGCTGTACAAG

**Amino acid sequence of SpyCatcher003-mCherry:**

MSYHHHHHHHDYDIPTTENLYFQGAMVTTLSGLSGEQGPSGDMTTEEDSATHIKFSKRDEDGRELAGATMELRDSS  
GKTISTWISDGHVKDFLYPGKYTFVETAAPDGYEVATPIEFTVNEDGQVTVDGEATEGDAHTGSSGSGSSGSSVSKG  
EDDNMAIIEFMRFKVHMEGSVNGHEFEIEGEGEGRPYEGTQTAKLKVTKGGPLPFAWDILSPQFMYGSKAYVKHP  
ADIPDYLKLSFPEGFKWERVMNFEDGGVVTVTQDSSLQDGEFIYKVKLRGTNFPDGPVMQKKTMGWEASSERMY  
PEDGALKGEIKQLKLDGGHYDAEVKTTYKAKKPVQLPGAYNVNIKLDITSHNEDYTIVEQYERAEGRHSTGGMDEL  
YK\*
